# Supplementary material
Source: publisher site journal article supplement (https://www.spandidos-publications.com/2371/downloadSupplementary)

Figure S1. RNA-sequencing data analysis. (A) Gene Set Enrichment Analysis (GSEA) shows the effects of TCF7 and imatinib on ABC transporters signaling pathways in CML imatinib-resistant cells. (B) GSEA analysis shows the effects of TCF7 and imatinib on Wnt signaling pathways in CML imatinib-resistant cells. (C) GSEA analysis shows the effects of TCF7 and imatinib on the expression of *TCF7* targets in CML imatinib-resistant cells. (D) Intersection of four groups of genes shown by a Venn diagram. (E) Expression of *TCF7* in BCR-ABL1<sup>+</sup> LSCs in groups of poor (10 patients, 663 cells) and good (12 patients, 340 cells) responders. TCF7, transcription factor 7; KD, knockdown; CML, chronic myeloid leukemia; LSCs, leukemia stem cells.

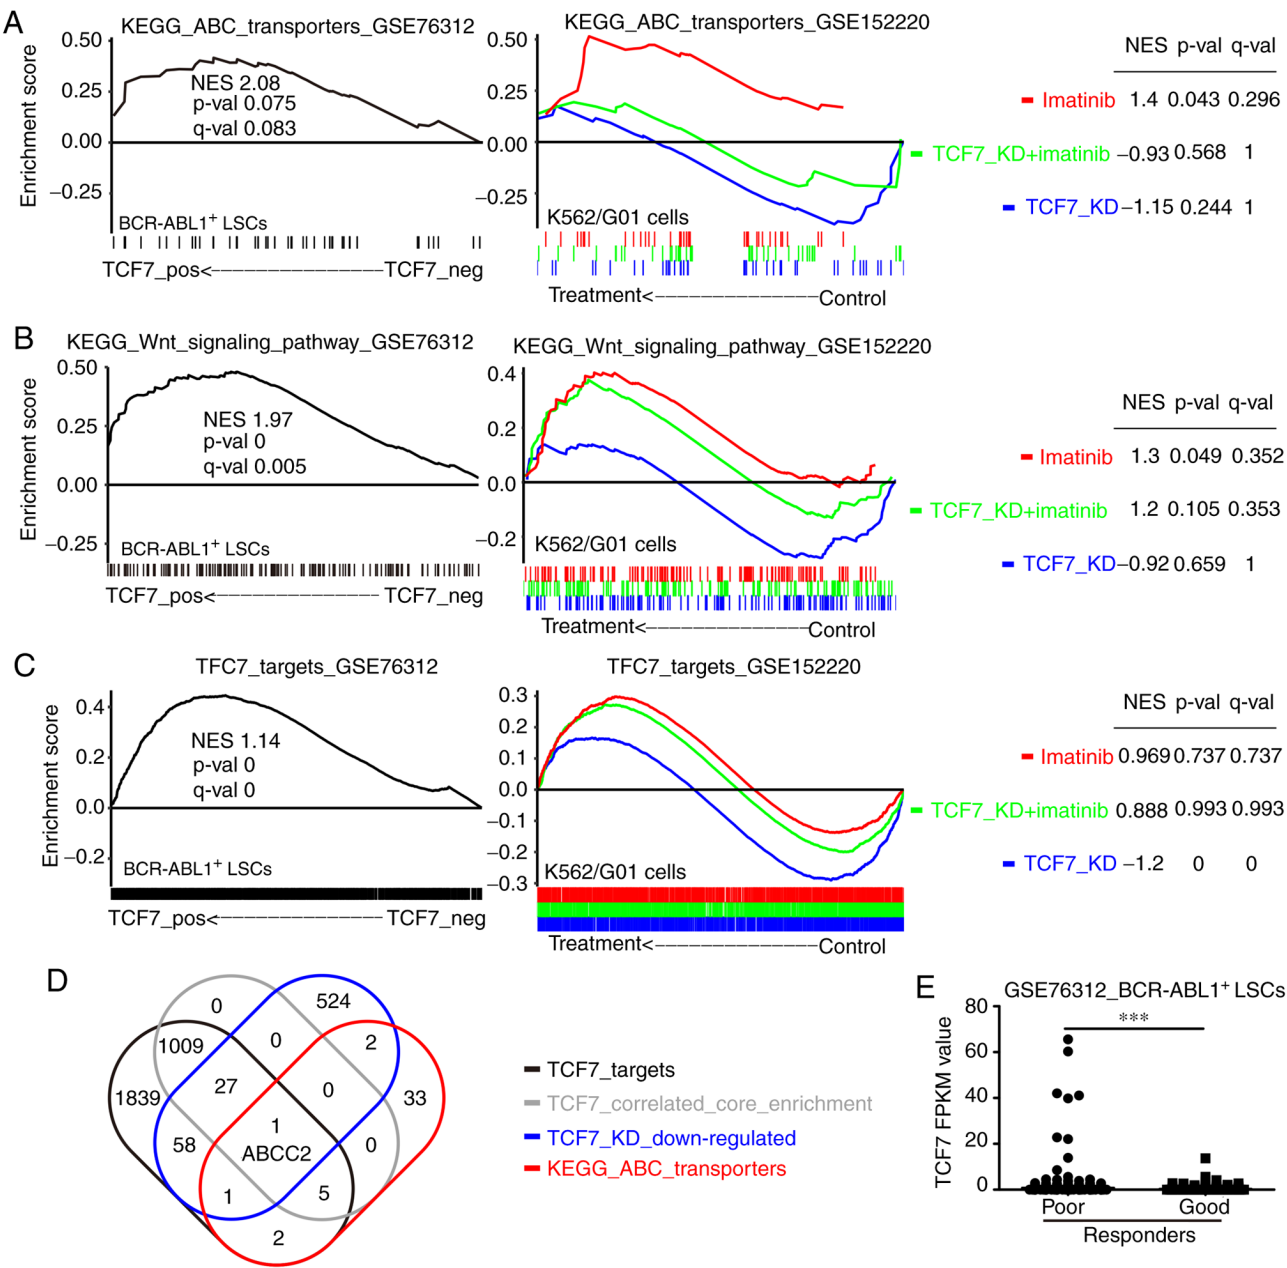

Supplement: Supplementary file 1 [file downloadSupplementary]
